# Supplementary material for: Potent Anti-Inflammatory and Antiproliferative Effects of Gambogic Acid in a Rat Model of Antigen-Induced Arthritis
Source: Hindawi journal article supplement (doi:10.1155/2014/195327), 2014-01-01

CONTROL

DMSO

GA

50X

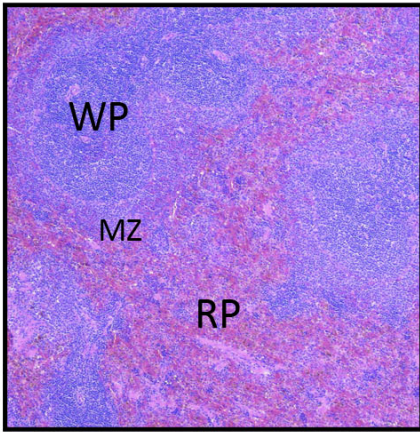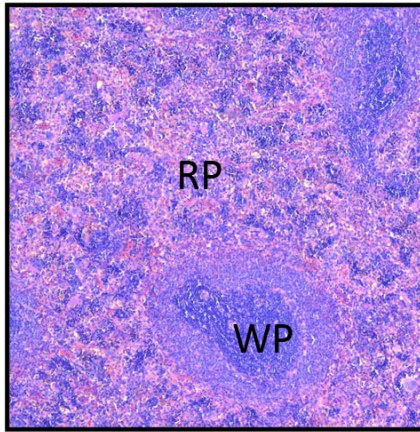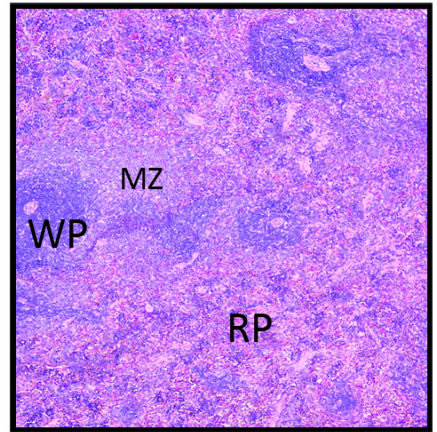

200X

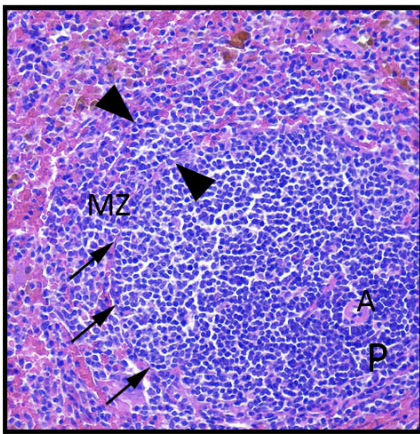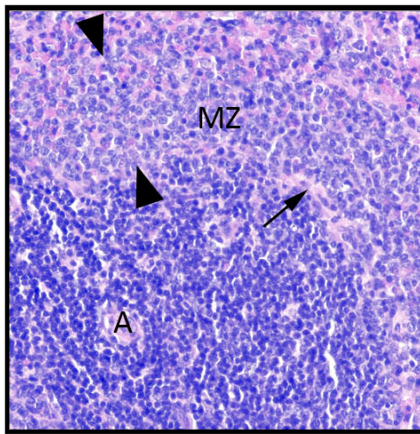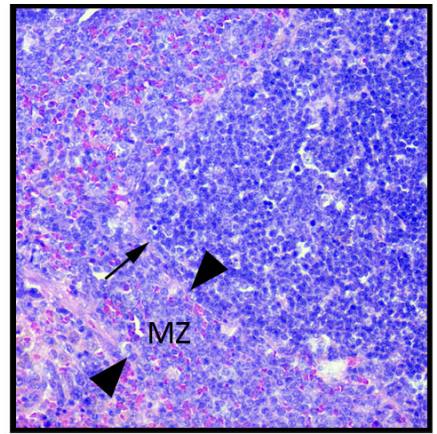

Supplement: f1 [file 195327.f1.pdf]
